# Supplementary material for: Widespread Occurrence of Bd in French Guiana, South America
Source: PLoS One. 2015 Apr 22;10(4):e0125128. doi: 10.1371/journal.pone.0125128 (PMC4406614; doi:10.1371/journal.pone.0125128)
Supplement: S1 Table — SP indicates single positive (considered as negative for the analysis) and DP double positive. Only samples labeled DP with a Bd load greater than 0.1 GE were considered as positive and are highlighted in bold. (XLS) [file pone.0125128.s001.xls]

## Sheet: Feuil1
Nombre de Bd positive
Bd positive	Total
no	37
yes	70
Total général	107

## Sheet: Sheet1
year	site	species	Bd detection	Bd load (GE)	Bd positive
2009	Pararé	Dendrobates tinctorius	DP	0.589	yes
	Pararé	Dendrobates tinctorius	DP	0.299	yes
	Pararé	Dendrobates tinctorius	DP	1.03	yes
	Favard	Dendrobates tinctorius	DP	0.654	yes
	Favard	Dendrobates tinctorius	DP	3.25	yes
	Favard	Dendrobates tinctorius	DP	127	yes
	Favard	Dendrobates tinctorius	DP	47.8	yes
	Favard	Dendrobates tinctorius	DP	117	yes
	Favard	Dendrobates tinctorius	DP	47.5	yes
	Favard	Dendrobates tinctorius	DP	0.423	yes
	Favard	Dendrobates tinctorius	SP	0.02	no
	Favard	Dendrobates tinctorius	SP	0.123	no
	Favard	Dendrobates tinctorius	SP	0.035	no
	Favard	Dendrobates tinctorius	SP	0.0192	no
	Trésor	Dendrobates tinctorius	SP	0.0343	no
	Trésor	Dendrobates tinctorius	SP	0.111	no
2011-2012	ADNG	Dendropsophus leucophylatus	SP	0.0259	no
	ADNG	Dendropsophus minutus	DP	0.23	yes
	ADNG	Dendropsophus minutus	SP	0.399	no
	ADNG	Dendropsophus minutus	SP	0.129	no
	ADNG	Dendropsophus minutus	SP	0.07	no
	ADNG	Dendropsophus minutus	DP	0.0698	no
	Favard	Dendrobates tinctorius	DP	71.3	yes
	Favard	Dendrobates tinctorius	DP	9.45	yes
	Favard	Dendrobates tinctorius	DP	1.64	yes
	Favard	Dendrobates tinctorius	DP	1.28	yes
	Favard	Dendrobates tinctorius	DP	0.42	yes
	Favard	Dendrobates tinctorius	DP	0.328	yes
	Favard	Dendrobates tinctorius	DP	0.272	yes
	Favard	Dendrobates tinctorius	DP	0.118	yes
	Favard	Dendrobates tinctorius	DP	0.118	yes
	Favard	Dendrobates tinctorius	SP	0.346	no
	Favard	Dendrobates tinctorius	SP	0.188	no
	Favard	Dendrobates tinctorius	SP	0.113	no
	Inselberg	Dendrobates tinctorius	DP	7420	yes
	Inselberg	Dendrobates tinctorius	DP	46.4	yes
	Inselberg	Dendrobates tinctorius	DP	43	yes
	Inselberg	Dendrobates tinctorius	DP	15	yes
	Inselberg	Dendrobates tinctorius	DP	6.59	yes
	Inselberg	Dendrobates tinctorius	DP	4.53	yes
	Inselberg	Dendrobates tinctorius	DP	1.03	yes
	Matoury	Atelopus flavescens	DP	1.48	yes
	Matoury	Atelopus flavescens	DP	1.02	yes
	Matoury	Atelopus flavescens	DP	0.817	yes
	Matoury	Atelopus flavescens	DP	0.251	yes
	Montagne des singes	Anomaloglossus baeobatracchus	DP	210	yes
	Montagne des singes	Anomaloglossus baeobatracchus	DP	83.7	yes
	Montagne des singes	Anomaloglossus baeobatracchus	DP	8.14	yes
	Montagne des singes	Anomaloglossus baeobatracchus	DP	6.48	yes
	Montagne des singes	Anomaloglossus baeobatracchus	DP	1.65	yes
	Montagne des singes	Anomaloglossus baeobatracchus	DP	0.353	yes
	Montagne des singes	Anomaloglossus baeobatracchus	DP	0.242	yes
	Montagne des singes	Anomaloglossus baeobatracchus	DP	0.22	yes
	Montagne des singes	Anomaloglossus baeobatracchus	DP	0.11	yes
	Pararé	Allobates femoralis	DP	28.3	yes
	Pararé	Allobates femoralis	DP	17.5	yes
	Pararé	Allobates femoralis	DP	14.2	yes
	Pararé	Allobates femoralis	DP	14.1	yes
	Pararé	Allobates femoralis	DP	4.28	yes
	Pararé	Allobates femoralis	DP	3.67	yes
	Pararé	Allobates femoralis	DP	2.49	yes
	Pararé	Allobates femoralis	DP	1.63	yes
	Pararé	Allobates femoralis	DP	0.749	yes
	Pararé	Allobates femoralis	DP	0.437	yes
	Pararé	Allobates femoralis	DP	0.435	yes
	Pararé	Allobates femoralis	DP	0.212	yes
	Pararé	Allobates femoralis	DP	0.183	yes
	Pararé	Allobates femoralis	SP	0.835	no
	Pararé	Allobates femoralis	SP	0.441	no
	Pararé	Allobates femoralis	SP	0.187	no
	Pararé	Allobates femoralis	SP	0.184	no
	Pararé	Atelopus flavescens	DP	6	yes
	Pararé	Atelopus flavescens	DP	5.78	yes
	Pararé	Atelopus flavescens	SP	0.249	no
	Pararé	Dendrobates tinctorius	DP	7.53	yes
	Pararé	Dendrobates tinctorius	DP	1.09	yes
	Pararé	Dendrobates tinctorius	DP	0.66	yes
	Pararé	Dendrobates tinctorius	DP	0.547	yes
	Pararé	Dendrobates tinctorius	SP	0.116	no
	Pararé	Rhinella castaneotica	DP	1.45	yes
	Pararé	Rhinella margaritifera	DP	0.0262	no
	Pararé	Rhinella margaritifera	SP	0.0187	no
	Saint Elie	Anomaloglossus aff degranvillei 1	SP	0.0528	no
	Saint Elie	Anomaloglossus baeobatracchus	SP	0.242	no
	Saint Elie	Rhinella margaritifera	SP	0.081	no
	Saint-Georges	Amazophrynella sp1	DP	0.0142	no
	Saut Maripa	Anomaloglossus baeobatracchus	DP	42.1	yes
	Saut Maripa	Anomaloglossus baeobatracchus	DP	3.67	yes
	Saut Maripa	Anomaloglossus baeobatracchus	DP	3.34	yes
	Saut Maripa	Anomaloglossus baeobatracchus	SP	0.666	no
	Saut Maripa	Anomaloglossus baeobatracchus	SP	0.114	no
	Saut Maripa	Anomaloglossus baeobatracchus	SP	0.0931	no
	Saut Maripa	Anomaloglossus baeobatracchus	DP	0.065	no
	Saut Maripa	Ranitomeya amazonica	DP	5.93	yes
	Saut Maripa	Ranitomeya amazonica	DP	4.13	yes
	Saut Maripa	Ranitomeya amazonica	SP	0.124	no
	Saut Maripa	Ranitomeya amazonica	DP	0.0668	no
	Trésor	Chiasmocleis shudikarensis	DP	1.62	yes
	Trésor	Chiasmocleis shudikarensis	DP	0.806	yes
	Trésor	Chiasmocleis shudikarensis	DP	0.148	yes
	Trésor	Chiasmocleis shudikarensis	DP	0.0747	no
	Trésor	Chiasmocleis shudikarensis	DP	0.045	no
	Trésor	Chiasmocleis shudikarensis	DP	0.0264	no
	Trésor	Dendrobates tinctorius	DP	1.33	yes
	Trésor	Dendrobates tinctorius	DP	0.294	yes
	Trinité	Rhinella margaritifera	SP	0.0607	no
	Trinité	Rhinella margaritifera	SP	0.0428	no
